# Supplementary material for: Associations between female birth sex and risk of chronic kidney disease development among people with HIV in the USA: A longitudinal, multicentre, cohort study
Source: PubMed Central journal article supplement — eClinicalMedicine. 2022 Sep 17;53:101653. doi: 10.1016/j.eclinm.2022.101653 (PMC9489495; doi:10.1016/j.eclinm.2022.101653), 2022-09-17

## **Supplemental Materials**

**Supplemental Table 1.** Univariable risk of CKD development using Cox proportional hazards models

|                                  | <b>Overall</b>          | <b>Genotyped Cohort</b> | <b>PRO Cohort</b>       |
|----------------------------------|-------------------------|-------------------------|-------------------------|
|                                  | N=33,998                | N=7,467                 | N=16,535                |
|                                  | HR (95% CI)             | HR (95% CI)             | HR (95% CI)             |
| <b>Demographics</b>              |                         |                         |                         |
| Female sex                       | <b>1.72 (1.41-2.10)</b> | <b>1.54 (1.25-1.90)</b> | <b>1.46 (1.23-1.74)</b> |
| Age at study entry               | <b>1.09 (1.08-1.10)</b> | <b>1.08 (1.07-1.09)</b> | <b>1.09 (1.07-1.10)</b> |
| Baseline creatinine              | <b>1.06 (1.04-1.08)</b> | <b>1.39 (1.36-1.42)</b> | <b>1.43 (1.38-1.48)</b> |
| <b>Covariate</b>                 |                         |                         |                         |
| African ancestry                 | --                      | 1.30 (0.95-1.77)        | --                      |
| AAB race (ref: Non-AAB)          | <b>1.36 (1.09-1.70)</b> | 1.20 (0.92-1.57)        | 1.08 (0.86-1.36)        |
| <i>APOLI</i> (ref: 0)            |                         |                         |                         |
| 1                                | --                      | 1.04 (0.80-1.36)        | --                      |
| 2                                | --                      | <b>1.92 (1.49-2.49)</b> | --                      |
| <b>HIV Characteristics</b>       |                         |                         |                         |
| <b>Risk factor</b>               |                         |                         |                         |
| Heterosexual contact             | <b>1.59 (1.27-1.98)</b> | <b>1.36 (1.15-1.62)</b> | <b>1.27 (1.09-1.49)</b> |
| IDU                              | <b>2.22 (1.79-2.75)</b> | <b>2.13 (1.74-2.61)</b> | <b>1.75 (1.53-2.01)</b> |
| MSM and IDU                      | 0.96 (0.80-1.14)        | 0.92 (0.63-1.33)        | <b>0.71 (0.62-0.81)</b> |
| Other                            | <b>1.25 (0.95-1.65)</b> | <b>1.83 (1.51-2.20)</b> | <b>1.39 (1.20-1.62)</b> |
| Missing                          | 1.30 (0.83-2.02)        | <b>1.62 (1.13-2.30)</b> | <b>1.52 (1.19-1.94)</b> |
| CD4 < 200                        | <b>1.60 (1.44-1.78)</b> | <b>1.31 (1.20-1.43)</b> | 1.14 (0.93-1.38)        |
| Nadir CD4 < 200                  | <b>1.12 (1.00-1.25)</b> | 1.06 (0.97-1.15)        | <b>1.30 (1.13-1.49)</b> |
| ARV at baseline                  | <b>1.29 (1.16-1.44)</b> | <b>1.25 (1.15-1.35)</b> | <b>1.35 (1.20-1.51)</b> |
| Log viral copy-years             | <b>1.08 (1.07-1.09)</b> | <b>1.06 (1.01-1.11)</b> |                         |
| ART duration                     | <b>1.03 (1.00-1.05)</b> | <b>1.02 (1.00-1.04)</b> | <b>1.07 (1.03-1.11)</b> |
| PI duration                      | <b>1.04 (1.02-1.07)</b> | <b>1.04 (1.01-1.07)</b> | <b>1.06 (1.02-1.11)</b> |
| Tenofovir duration               | <b>1.06 (1.01-1.12)</b> | <b>1.08 (1.02-1.15)</b> | 1.06 (0.99-1.13)        |
| Integrase duration               | <b>1.10 (1.07-1.15)</b> | <b>1.12 (1.04-1.21)</b> | <b>1.10 (1.01-1.20)</b> |
| Atazanavir duration              | <b>1.04 (1.01-1.07)</b> | 1.00 (0.92-1.08)        | <b>1.06 (1.01-1.11)</b> |
| Indinavir duration               | <b>1.04 (1.01-1.07)</b> | 1.02 (0.98-1.06)        | <b>1.08 (1.03-1.12)</b> |
| Lopinavir duration               | <b>1.07 (1.03-1.11)</b> | 1.09 (0.996-1.18)       | <b>1.10 (1.03-1.17)</b> |
| <b>Comorbid Conditions</b>       |                         |                         |                         |
| HCV infection                    | <b>1.61 (1.38-1.89)</b> | <b>1.53 (1.28-1.82)</b> | <b>1.25 (1.08-1.46)</b> |
| HBV infection                    | <b>1.46 (1.31-1.63)</b> | 1.14 (0.96-1.34)        | <b>1.31 (1.17-1.46)</b> |
| Diabetes                         | <b>3.52 (3.00-4.13)</b> | <b>2.38 (1.97-2.88)</b> | <b>2.36 (2.06-2.69)</b> |
| Hypertension                     | <b>3.70 (3.16-4.33)</b> | <b>3.17 (2.77-3.62)</b> | <b>3.17 (2.78-3.60)</b> |
| <b>Patient Reported Outcomes</b> |                         |                         |                         |
| High risk alcohol abuse          | --                      | --                      | <b>0.53 (0.47-0.60)</b> |
| IDU                              | --                      | --                      | 0.93 (0.79-1.09)        |
| Methamphetamine use              | --                      | --                      | <b>0.85 (0.79-0.92)</b> |
| Marijuana use                    | --                      | --                      | <b>0.82 (0.76-0.88)</b> |
| Illicit opioid use               | --                      | --                      | 0.98 (0.90-1.08)        |
| Cocaine/crack use                | --                      | --                      | 0.98 (0.91-1.05)        |

**Supplemental Table 2.** Univariable risk of CKD development using Fine and Gray competing risks regression

|                                  | <b>CNICS Cohort</b>     | <b>Genotyped Cohort</b> | <b>PRO Cohort</b>       |
|----------------------------------|-------------------------|-------------------------|-------------------------|
|                                  | N=33,998                | N=7,467                 | N=16,535                |
|                                  | HR (95% CI)             | HR (95% CI)             | HR (95% CI)             |
| <b>Demographics</b>              |                         |                         |                         |
| Female sex                       | <b>1.67 (1.39-2.01)</b> | <b>1.54 (1.24-1.91)</b> | <b>1.47 (1.24-1.74)</b> |
| Age at study entry               | <b>1.08 (1.07-1.09)</b> | <b>1.07 (1.07-1.08)</b> | <b>1.09 (1.08-1.10)</b> |
| Baseline creatinine              | <b>1.06 (1.04-1.08)</b> | <b>1.37 (1.34-1.41)</b> | <b>1.43 (1.37-1.48)</b> |
| <b>Covariate</b>                 |                         |                         |                         |
| African ancestry                 | --                      | 1.28 (0.95-1.71)        | --                      |
| AAB race (ref: Non-AAB)          | <b>1.30 (1.08-1.56)</b> | 1.19 (0.92-1.53)        | 1.08 (0.86-1.36)        |
| <i>APOLI</i> (ref: 0)            |                         |                         |                         |
| 1                                | --                      | 1.03 (0.79-1.33)        | --                      |
| 2                                | --                      | <b>1.88 (1.47-2.42)</b> | --                      |
| <b>HIV Characteristics</b>       |                         |                         |                         |
| <b>Risk factor</b>               |                         |                         |                         |
| Heterosexual contact             | <b>1.53 (1.24-1.90)</b> | <b>1.35 (1.13-1.61)</b> | <b>1.28 (1.09-1.50)</b> |
| IDU                              | <b>1.89 (1.54-2.32)</b> | <b>1.96 (1.62-2.38)</b> | <b>1.81 (1.57-2.08)</b> |
| MSM and IDU                      | 0.88 (0.76-1.02)        | 0.87 (0.62-1.24)        | <b>0.72 (0.64-0.82)</b> |
| Other                            | 1.23 (0.91-1.65)        | <b>1.79 (1.49-2.16)</b> | <b>1.39 (1.18-1.63)</b> |
| Missing                          | 1.27 (0.86-1.87)        | <b>1.47 (1.03-2.08)</b> | <b>1.53 (1.21-1.95)</b> |
| CD4 < 200                        | <b>1.47 (1.33-1.63)</b> | <b>1.27 (1.17-1.37)</b> | <b>1.28 (1.03-1.59)</b> |
| Nadir CD4 < 200                  | <b>1.20 (1.08-1.33)</b> | <b>1.10 (1.00-1.20)</b> | <b>1.31 (1.14-1.51)</b> |
| ARV at baseline                  | <b>1.25 (1.12-1.40)</b> | <b>1.20 (1.12-1.29)</b> | <b>1.43 (1.29-1.59)</b> |
| Log viral copy-years             | <b>1.08 (1.06-1.11)</b> | <b>1.06 (1.01-1.11)</b> | <b>1.04 (1.01-1.08)</b> |
| ART duration                     | 1.01 (0.99-1.02)        | 1.02 (0.99-1.04)        | <b>1.12 (1.08-1.16)</b> |
| PI duration                      | 1.02 (0.997-1.03)       | <b>1.04 (1.01-1.07)</b> | <b>1.07 (1.02-1.12)</b> |
| Tenofovir duration               | 1.02 (0.99-1.06)        | <b>1.08 (1.03-1.14)</b> | 1.06 (0.99-1.13)        |
| Integrase duration               | <b>1.04 (1.00-1.07)</b> | <b>1.12 (1.04-1.20)</b> | <b>1.12 (1.04-1.20)</b> |
| Atazanavir duration              | 0.99 (0.94-1.03)        | 1.00 (0.93-1.08)        | <b>1.05 (1.01-1.09)</b> |
| Indinavir duration               | <b>1.03 (1.02-1.04)</b> | 1.01 (0.97-1.06)        | <b>1.07 (1.03-1.12)</b> |
| Lopinavir duration               | 1.01 (0.98-1.04)        | 1.07 (0.98-1.16)        | <b>1.10 (1.03-1.17)</b> |
| <b>Comorbid Conditions</b>       |                         |                         |                         |
| HCV infection                    | <b>1.45 (1.26-1.67)</b> | <b>1.42 (1.20-1.69)</b> | <b>1.28 (1.10-1.50)</b> |
| HBV infection                    | <b>1.40 (1.26-1.55)</b> | 1.10 (0.93-1.29)        | <b>1.32 (1.18-1.48)</b> |
| Diabetes                         | <b>3.35 (2.91-3.87)</b> | <b>2.35 (1.93-2.88)</b> | <b>2.37 (2.09-2.69)</b> |
| Hypertension                     | <b>3.58 (3.13-4.09)</b> | <b>3.08 (2.69-3.53)</b> | <b>3.22 (2.82-3.68)</b> |
| <b>Patient Reported Outcomes</b> |                         |                         |                         |
| High risk alcohol abuse          | --                      | --                      | <b>0.54 (0.46-0.65)</b> |
| IDU                              | --                      | --                      | 0.94 (0.78-1.14)        |
| Methamphetamine use              | --                      | --                      | <b>0.74 (0.61-0.90)</b> |
| Marijuana use                    | --                      | --                      | <b>0.90 (0.72-0.90)</b> |
| Illicit opioid use               | --                      | --                      | 1.03 (0.89-1.19)        |
| Cocaine/crack use                | --                      | --                      | 0.97 (0.82-1.14)        |

---

**Supplemental Table 3.** Multivariable Cox regression models for incident CKD, including BMI and baseline eGFR

|                                  | <b>Overall Cohort</b>      | <b>Genotyped Cohort</b>    | <b>PRO Cohort</b>          | <b>PRO + Genetics Cohort</b> |
|----------------------------------|----------------------------|----------------------------|----------------------------|------------------------------|
|                                  | N=33,998                   | N=7,467                    | N=16,535                   | N=5,344                      |
|                                  | aHR (95% CI)               | aHR (95% CI)               | aHR (95% CI)               | aHR (95% CI)                 |
| <b>Demographics</b>              |                            |                            |                            |                              |
| Female sex                       | <b>1.36 (1.22-1.52)</b>    | <b>1.36 (1.16-1.60)</b>    | <b>1.41 (1.17-1.70)</b>    | <b>1.35 (1.02-1.78)</b>      |
| Age at study entry               | <b>1.057 (1.052-1.063)</b> | <b>1.059 (1.050-1.067)</b> | <b>1.057 (1.049-1.066)</b> | <b>1.05 (1.04-1.07)</b>      |
| Baseline eGFR                    | <b>0.944 (0.942-0.946)</b> | <b>0.944 (0.941-0.946)</b> | <b>0.945 (0.942-0.948)</b> | <b>0.949 (0.945-0.953)</b>   |
| <b>Covariate</b>                 |                            |                            |                            |                              |
| African ancestry                 | --                         | <b>0.74 (0.59-0.91)</b>    | --                         | 1.44 (0.71-2.90)             |
| Black race (ref: Non-black)      | <b>0.77 (0.68-0.85)</b>    | --                         | <b>0.80 (0.67-0.97)</b>    | <b>0.51 (0.28-0.92)</b>      |
| <i>APOLI</i> (ref: 0)            |                            |                            |                            |                              |
| 1                                | --                         | 0.85 (0.70-1.03)           | --                         | 0.75 (0.55-1.01)             |
| 2                                | --                         | 1.13 (0.88-1.46)           | --                         | 1.18 (0.75-1.86)             |
| <b>HIV Characteristics</b>       |                            |                            |                            |                              |
| CD4 < 200                        | 1.10 (0.99-1.22)           | --                         | --                         | --                           |
| ARV Naïve                        | <b>0.85 (0.77-0.94)</b>    | --                         | <b>0.84 (0.70-0.999)</b>   | --                           |
| Log viral copy-years             | <b>0.97 (0.95-0.99)</b>    | --                         | <b>0.91 (0.88-0.94)</b>    | --                           |
| ART duration                     | --                         | --                         | <b>0.97 (0.94-0.999)</b>   | --                           |
| PI duration                      | --                         | 1.04 (0.996-1.09)          | --                         | --                           |
| Tenofovir duration               | --                         | --                         | --                         | --                           |
| Integrase duration               | <b>1.11 (1.07-1.14)</b>    | <b>1.14 (1.05-1.23)</b>    | <b>1.10 (1.05-1.16)</b>    | <b>1.22 (1.14-1.30)</b>      |
| Atazanavir duration              | --                         | --                         | <b>1.08 (1.03-1.14)</b>    | --                           |
| Indinavir duration               | --                         | 0.89 (0.78-1.003)          | <b>0.86 (0.79-0.995)</b>   | --                           |
| Lopinavir duration               | --                         | --                         | --                         | --                           |
| <b>Comorbid Conditions</b>       |                            |                            |                            |                              |
| HCV infection                    | <b>0.86 (0.77-0.97)</b>    | --                         | <b>0.78 (0.64-0.95)</b>    | --                           |
| HBV infection                    | --                         | --                         | --                         | --                           |
| Diabetes                         | --                         | --                         | --                         | --                           |
| Hypertension                     | <b>1.50 (1.33-1.69)</b>    | <b>1.51 (1.28-1.79)</b>    | 1.22 (0.995-1.50)          | <b>1.37 (1.05-1.81)</b>      |
| BMI                              |                            |                            |                            |                              |
| <19                              | <b>1.35 (1.05-1.75)</b>    | <b>1.61 (1.11-2.32)</b>    | <b>1.45 (1.02-2.07)</b>    | <b>1.80 (1.04-3.12)</b>      |
| 19-24                            | Ref                        | Ref                        | Ref                        | Ref                          |
| 25-29                            | 0.90 (0.81-1.01)           | 0.96 (0.82-1.13)           | 0.93 (0.78-1.12)           | 0.83 (0.64-1.07)             |
| ≥30                              | 0.91 (0.80-1.04)           | 0.92 (0.76-1.11)           | 0.88 (0.69-1.11)           | 0.84 (0.59-1.18)             |
| <b>Patient Reported Outcomes</b> |                            |                            |                            |                              |
| High risk alcohol abuse          | --                         | --                         | <b>0.78 (0.66-0.93)</b>    | <b>0.58 (0.46-0.75)</b>      |
| IDU*                             | --                         | --                         | --                         | --                           |
| Amphetamine use*                 | --                         | --                         | --                         | --                           |
| Marijuana use*                   | --                         | --                         | --                         | --                           |
| Opiate use*                      | --                         | --                         | --                         | --                           |
| Crack/cocaine use*               | --                         | --                         | --                         | --                           |

\* among 10,207 PLWH (1,025 CKD events)

**Supplemental Table 4.** Multivariable Fine and Gray regression models for incident CKD, including BMI and baseline eGFR

|                                  | <b>CNICS Cohort</b>        | <b>Genotyped Cohort</b>    | <b>PRO Cohort</b>          | <b>PRO + Genetics Cohort</b> |
|----------------------------------|----------------------------|----------------------------|----------------------------|------------------------------|
|                                  | N=33,998                   | N=7,467                    | N=16,535                   | N=5,344                      |
|                                  | asdHR (95% CI)             | asdHR (95% CI)             | asdHR (95% CI)             | asdHR (95% CI)               |
| <b>Demographics</b>              |                            |                            |                            |                              |
| Female sex                       | <b>1.29 (1.18-1.42)</b>    | <b>1.29 (1.06-1.57)</b>    | <b>1.32 (1.14-1.52)</b>    | <b>1.22 (1.02-1.45)</b>      |
| Age at study entry               | <b>1.050 (1.045-1.054)</b> | <b>1.033 (1.024-1.041)</b> | <b>1.050 (1.044-1.057)</b> | <b>1.049 (1.041-1.057)</b>   |
| Baseline eGFR                    | <b>0.951 (0.950-0.952)</b> | <b>0.967 (0.964-0.970)</b> | <b>0.947 (0.944-0.949)</b> | <b>0.950 (0.947-0.953)</b>   |
| <b>Covariate</b>                 |                            |                            |                            |                              |
| African ancestry                 | --                         | <b>0.69 (0.52-0.91)</b>    | --                         | <b>0.66 (0.53-0.82)</b>      |
| Black race (ref: Non-black)      | --                         | --                         | <b>0.76 (0.67-0.87)</b>    | --                           |
| <i>APOLI</i> (ref: 0)            |                            |                            |                            |                              |
| 1                                | --                         | 0.93 (0.72-1.22)           | --                         | 0.85 (0.69-1.03)             |
| 2                                | --                         | 1.09 (0.79-1.51)           | --                         | <b>1.34 (1.03-1.74)</b>      |
| <b>HIV Characteristics</b>       |                            |                            |                            |                              |
| CD4 < 200*                       | --                         | <b>1.30 (1.08-1.57)</b>    | 1.13 (0.998-1.28)          | --                           |
| ARV Naïve                        | <b>0.91 (0.84-0.98)</b>    | <b>1.25 (1.04-1.49)</b>    | --                         | --                           |
| Log viral copy-years             | --                         | --                         | --                         | 1.045 (1.012-1.078)          |
| ART duration                     | --                         | --                         | --                         | --                           |
| PI duration                      | --                         | --                         | <b>1.02 (1.00-1.05)</b>    | --                           |
| Tenofovir duration               | --                         | --                         | --                         | --                           |
| Integrase duration               | <b>1.11 (1.08-1.13)</b>    | --                         | <b>1.10 (1.07-1.13)</b>    | <b>1.16 (1.09-1.23)</b>      |
| <b>Comorbid Conditions</b>       |                            |                            |                            |                              |
| HCV infection                    | <b>0.78 (0.71-0.85)</b>    | --                         | <b>0.79 (0.69-0.91)</b>    | <b>0.81 (0.69-0.96)</b>      |
| HBV infection                    | --                         | --                         | --                         | --                           |
| Diabetes                         | --                         | <b>1.38 (1.12-1.69)</b>    | --                         | --                           |
| Hypertension                     | <b>1.53 (1.39-1.69)</b>    | --                         | <b>1.60 (1.40-1.84)</b>    | <b>1.54 (1.31-1.82)</b>      |
| <b>BMI</b>                       |                            |                            |                            |                              |
| <19                              | 1.20 (0.96-1.49)           | 1.13 (0.75-1.70)           | <b>1.44 (1.10-1.89)</b>    | <b>1.64 (1.17-2.82)</b>      |
| 19-24                            | Ref                        | Ref                        | Ref                        | Ref                          |
| 25-29                            | 0.95 (0.87-1.04)           | 0.89 (0.72-1.11)           | 0.95 (0.83-1.08)           | 0.95 (0.81-1.12)             |
| ≥30                              | 0.94 (0.84-1.05)           | 0.74 (0.58-0.95)           | 0.94 (0.80-1.10)           | 0.94 (0.77-1.15)             |
| <b>Patient Reported Outcomes</b> |                            |                            |                            |                              |
| High risk alcohol abuse          | --                         | --                         | 0.85 (0.71-1.02)           | <b>0.63 (0.49-0.82)</b>      |
| IDU*                             | --                         | --                         | --                         | --                           |
| Amphetamine use*                 | --                         | --                         | --                         | --                           |
| Marijuana use*                   | --                         | --                         | --                         | --                           |
| Opiate use*                      | --                         | --                         | --                         | --                           |

\* among 10,207 PLWH (1,025 CKD events)

**Supplemental Table 5.** Univariable Cox regression models for incident CKD, excluding the race coefficient from the CKD-EPI equation

|                                  | <b>Genotyped Cohort</b> | <b>CNICS Cohort</b>     | <b>PRO Cohort</b>       |
|----------------------------------|-------------------------|-------------------------|-------------------------|
|                                  | N=7,467                 | N=33,998                | N=16,535                |
|                                  | HR (95% CI)             | HR (95% CI)             | HR (95% CI)             |
| <b>Demographics</b>              |                         |                         |                         |
| Female sex                       | <b>1.61 (1.44-1.80)</b> | <b>1.71 (1.60-1.84)</b> | <b>1.57 (1.43-1.71)</b> |
| Age at study entry               | <b>1.08 (1.07-1.08)</b> | <b>1.09 (1.08-1.09)</b> | <b>1.09 (1.08-1.09)</b> |
| Baseline creatinine              | <b>1.38 (1.32-1.43)</b> | <b>1.06 (1.04-1.08)</b> | <b>1.40 (1.35-1.46)</b> |
| <b>Covariate</b>                 |                         |                         |                         |
| African ancestry                 | <b>2.07 (1.84-2.33)</b> | --                      | --                      |
| Black race (ref: Non-black)      | <b>1.84 (1.66-2.04)</b> | <b>1.97 (1.84-2.10)</b> | <b>1.69 (1.56-1.83)</b> |
| <i>APOL1</i> (ref: 0)            |                         |                         |                         |
| 1                                | <b>1.31 (1.17-1.46)</b> | --                      | --                      |
| 2                                | <b>2.24 (1.90-2.64)</b> | --                      | --                      |
| <b>HIV Characteristics</b>       |                         |                         |                         |
| Risk factor                      |                         |                         |                         |
| Heterosexual contact             | <b>1.55 (1.38-1.75)</b> | <b>1.71 (1.59-1.84)</b> | <b>1.52 (1.39-1.67)</b> |
| IDU                              | <b>2.15 (1.87-2.48)</b> | <b>2.23 (2.04-2.45)</b> | <b>1.99 (1.77-2.24)</b> |
| MSM and IDU                      | 0.86 (0.68-1.09)        | 0.87 (0.76-1.00)        | <b>0.73 (0.61-0.88)</b> |
| Other                            | <b>1.84 (1.23-2.76)</b> | 1.22 (0.99-1.50)        | 1.30 (0.97-1.74)        |
| Missing                          | <b>1.72 (1.25-2.35)</b> | <b>1.42 (1.16-1.74)</b> | <b>1.89 (1.35-2.65)</b> |
| CD4 < 200                        | <b>1.38 (1.25-1.54)</b> | <b>1.65 (1.55-1.77)</b> | <b>1.47 (1.35-1.60)</b> |
| Nadir CD4 < 200                  | <b>1.42 (1.12-1.18)</b> | <b>1.42 (1.12-1.18)</b> | <b>1.39 (1.07-1.81)</b> |
| ARV Naïve                        | <b>0.82 (0.75-0.91)</b> | <b>0.82 (0.77-0.87)</b> | <b>0.77 (0.71-0.84)</b> |
| Log viral copy-years             | 1.01 (0.99-1.03)        | 1.00 (0.99-1.02)        | 0.99 (0.98-1.01)        |
| ART duration                     | <b>1.02 (1.00-1.04)</b> | <b>1.02 (1.01-1.03)</b> | <b>1.02 (1.01-1.04)</b> |
| PI duration                      | <b>1.04 (1.02-1.07)</b> | <b>1.04 (1.03-1.05)</b> | <b>1.04 (1.02-1.06)</b> |
| Tenofovir duration               | <b>1.09 (1.02-1.16)</b> | <b>1.06 (1.02-1.09)</b> | <b>1.06 (1.02-1.10)</b> |
| Integrase duration               | <b>1.09 (1.02-1.16)</b> | <b>1.08 (1.06-1.11)</b> | <b>1.10 (1.06-1.13)</b> |
| Atazanavir duration              | 1.04 (0.97-1.11)        | <b>1.05 (1.01-1.08)</b> | <b>1.04 (1.01-1.08)</b> |
| Indinavir duration               | 1.01 (0.96-1.07)        | 1.02 (0.99-1.06)        | <b>1.04 (1.00-1.07)</b> |
| Lopinavir duration               | <b>1.08 (1.01-1.15)</b> | <b>1.06 (1.03-1.10)</b> | <b>1.07 (1.03-1.11)</b> |
| <b>Comorbid Conditions</b>       |                         |                         |                         |
| HCV infection                    | <b>1.46 (1.31-1.63)</b> | <b>1.58 (1.47-1.69)</b> | <b>1.37 (1.25-1.49)</b> |
| HBV infection                    | <b>1.21 (1.02-1.43)</b> | <b>1.43 (1.29-1.60)</b> | <b>1.37 (1.20-1.57)</b> |
| Diabetes                         | <b>2.24 (2.02-2.49)</b> | <b>3.22 (3.01-3.45)</b> | <b>2.40 (2.20-2.61)</b> |
| Hypertension                     | <b>3.21 (2.87-3.59)</b> | <b>3.72 (3.47-4.00)</b> | <b>3.24 (2.96-3.54)</b> |
| <b>Patient Reported Outcomes</b> |                         |                         |                         |
| High risk alcohol abuse          | --                      | --                      | <b>0.59 (0.52-0.68)</b> |
| IDU*                             | --                      | --                      | <b>0.65 (0.43-0.97)</b> |
| Amphetamine use*                 | --                      | --                      | <b>0.51 (0.42-0.61)</b> |
| Marijuana use*                   | --                      | --                      | <b>0.66 (0.60-0.72)</b> |
| Opiate use*                      | --                      | --                      | 0.90 (0.69-1.17)        |
| Crack/cocaine use*               | --                      | --                      | 1.01 (0.87-1.17)        |

\* among 10,207 PLWH (1,025 CKD events)

**Supplemental Table 6.** Multivariable Fine and Gray regression models for incident CKD, including BMI and baseline eGFR

|                                  | Genotyped Cohort<br>N=7,467 | CNICS Cohort<br>N=33,998 | PRO Cohort<br>N=16,535  |
|----------------------------------|-----------------------------|--------------------------|-------------------------|
|                                  | HR (95% CI)                 | HR (95% CI)              | HR (95% CI)             |
| <b>Demographics</b>              |                             |                          |                         |
| Female sex                       | <b>1.61 (1.44-1.80)</b>     | <b>1.70 (1.58-1.82)</b>  | <b>1.57 (1.44-1.72)</b> |
| Age at study entry               | <b>1.07 (1.07-1.08)</b>     | <b>1.08 (1.08-1.08)</b>  | <b>1.08 (1.07-1.08)</b> |
| Baseline creatinine              | <b>1.37 (1.32-1.42)</b>     | <b>1.06 (1.04-1.08)</b>  | <b>1.40 (1.35-1.46)</b> |
| <b>Covariate</b>                 |                             |                          |                         |
| African ancestry                 | <b>2.05 (1.82-2.30)</b>     | --                       | --                      |
| Black race (ref: Non-black)      | <b>1.83 (1.65-2.02)</b>     | <b>1.90 (1.78-2.03)</b>  | <b>1.70 (1.57-1.85)</b> |
| <i>APOLI</i> (ref: 0)            |                             |                          |                         |
| 1                                | <b>1.30 (1.16-1.45)</b>     | --                       | --                      |
| 2                                | <b>2.21 (1.87-2.61)</b>     | --                       | --                      |
| <b>HIV Characteristics</b>       |                             |                          |                         |
| <b>Risk factor</b>               |                             |                          |                         |
| Heterosexual contact             | <b>1.54 (1.37-1.74)</b>     | <b>1.67 (1.56-1.80)</b>  | <b>1.53 (1.39-1.67)</b> |
| IDU                              | <b>2.00 (1.74-2.31)</b>     | <b>1.95 (1.78-2.13)</b>  | <b>1.93 (1.71-2.16)</b> |
| MSM and IDU                      | 0.84 (0.66-1.06)            | <b>0.82 (0.71-0.95)</b>  | <b>0.72 (0.60-0.87)</b> |
| Other                            | <b>1.66 (1.10-2.49)</b>     | 1.10 (0.89-1.35)         | <b>1.25 (0.93-1.67)</b> |
| Missing                          | <b>1.58 (1.16-2.17)</b>     | <b>1.30 (1.06-1.59)</b>  | <b>1.87 (1.34-2.62)</b> |
| CD4 < 200*                       | <b>1.34 (1.20-1.48)</b>     | <b>1.51 (1.41-1.61)</b>  | <b>1.46 (1.34-1.58)</b> |
| Nadir CD4 < 200                  | <b>1.35 (1.07-1.71)</b>     | <b>1.35 (1.07-1.71)</b>  | <b>1.38 (1.06-1.80)</b> |
| ARV Naïve                        | <b>0.85 (0.77-0.94)</b>     | <b>0.84 (0.79-0.89)</b>  | <b>0.79 (0.73-0.85)</b> |
| Log viral copy-years             | 1.01 (0.99-1.03)            | 1.00 (0.99-1.01)         | 0.99 (0.98-1.01)        |
| ART duration                     | 1.02 (1.00-1.04)            | <b>1.02 (1.01-1.03)</b>  | <b>1.02 (1.01-1.03)</b> |
| PI duration                      | <b>1.04 (1.01-1.06)</b>     | <b>1.03 (1.02-1.05)</b>  | <b>1.04 (1.02-1.05)</b> |
| Tenofovir duration               | <b>1.08 (1.01-1.15)</b>     | <b>1.05 (1.02-1.09)</b>  | <b>1.05 (1.01-1.09)</b> |
| Integrase duration               | <b>1.09 (1.02-1.16)</b>     | <b>1.08 (1.05-1.11)</b>  | <b>1.09 (1.06-1.12)</b> |
| Atazanavir duration              | 1.03 (0.96-1.11)            | <b>1.04 (1.01-1.08)</b>  | <b>1.04 (1.00-1.08)</b> |
| Indinavir duration               | 1.01 (0.96-1.07)            | 1.03 (0.99-1.06)         | <b>1.04 (1.00-1.07)</b> |
| Lopinavir duration               | 1.06 (0.99-1.14)            | <b>1.06 (1.03-1.10)</b>  | <b>1.06 (1.02-1.10)</b> |
| <b>Comorbid Conditions</b>       |                             |                          |                         |
| HCV infection                    | <b>1.39 (1.25-1.55)</b>     | <b>1.45 (1.36-1.56)</b>  | <b>1.32 (1.21-1.45)</b> |
| HBV infection                    | 1.18 (0.995-1.40)           | <b>1.38 (1.23-1.54)</b>  | <b>1.35 (1.18-1.55)</b> |
| Diabetes                         | <b>2.23 (2.00-2.48)</b>     | <b>3.20 (2.99-3.43)</b>  | <b>2.36 (2.17-2.57)</b> |
| Hypertension                     | <b>3.17 (2.84-3.55)</b>     | <b>3.69 (3.44-3.96)</b>  | <b>3.23 (2.96-3.53)</b> |
| <b>Patient Reported Outcomes</b> |                             |                          |                         |
| High risk alcohol abuse          | --                          | --                       | <b>0.60 (0.52-0.68)</b> |
| High risk alcohol abuse          | --                          | --                       | 0.97 (0.83-1.14)        |
| IDU*                             | --                          | --                       | <b>0.62 (0.57-0.68)</b> |
| Amphetamine use*                 | --                          | --                       | <b>0.77 (0.71-0.84)</b> |
| Marijuana use*                   | --                          | --                       | 1.04 (0.94-1.15)        |
| Opiate use*                      | --                          | --                       | 0.97 (0.90-1.05)        |

\* among 10,207 PLWH (1,025 CKD events)



**Supplemental Table 7.** Multivariable Cox proportional hazards regression for incident CKD, excluding the race coefficient from the CKD-EPI equation

|                            | <b>Overall</b>          | <b>Genotyped</b>        | <b>PRO Cohort</b>        | <b>Both</b>               |
|----------------------------|-------------------------|-------------------------|--------------------------|---------------------------|
|                            | aHR (95% CI)            | aHR (95% CI)            | aHR (95% CI)             | aHR (95% CI)              |
| <b>Demographics</b>        |                         |                         |                          |                           |
| Female sex                 | <b>1.48 (1.37-1.60)</b> | <b>1.69 (1.48-1.92)</b> | <b>1.49 (1.30-1.71)</b>  | <b>1.59 (1.36-1.85)</b>   |
| Age at study entry         | <b>1.08 (1.07-1.09)</b> | <b>1.08 (1.07-1.08)</b> | <b>1.08 (1.08-1.09)</b>  | <b>1.07 (1.065-1.082)</b> |
| Black race                 | <b>1.45 (1.35-1.56)</b> | 1.08 (0.79-1.48)        | <b>1.27 (1.15-1.40)</b>  | 1.05 (0.70-1.58)          |
| Baseline creatinine        | <b>1.06 (1.04-1.08)</b> | <b>1.37 (1.30-1.44)</b> | <b>1.37 (1.30-1.44)</b>  | <b>1.36 (1.25-1.47)</b>   |
| <i>APOLI</i> risk          | --                      | <b>1.28 (1.01-1.62)</b> | --                       | <b>1.37 (1.02-1.81)</b>   |
| African ancestry           | --                      | 1.17 (0.81-1.67)        | --                       | 1.10 (0.69-1.76)          |
| <b>Comorbid Conditions</b> |                         |                         |                          |                           |
| HCV infection              | <b>1.15 (1.07-1.24)</b> | --                      | --                       | --                        |
| HBV infection              | <b>1.32 (1.17-1.49)</b> | --                      | --                       | --                        |
| Diabetes                   | <b>1.79 (1.65-1.94)</b> | <b>1.31 (1.16-1.49)</b> | <b>1.25 (1.13-1.39)</b>  | <b>1.20 (1.04-1.38)</b>   |
| Hypertension               | <b>1.80 (1.66-1.96)</b> | <b>1.65 (1.43-1.92)</b> | <b>1.50 (1.34-1.69)</b>  | <b>1.55 (1.31-1.84)</b>   |
| Log VCY                    | <b>1.04 (1.02-1.05)</b> | <b>1.04 (1.02-1.07)</b> | --                       | --                        |
| ART duration               | --                      | --                      | <b>0.98 (0.96-0.995)</b> | 0.99 (0.96-1.01)          |
| PI duration                | --                      | --                      | --                       | --                        |
| INSTI duration             | <b>1.08 (1.05-1.11)</b> | <b>1.11 (1.03-1.19)</b> | <b>1.10 (1.06-1.13)</b>  | <b>1.14 (1.06-1.21)</b>   |
| CD4 < 200 cells/mL         | <b>1.48 (1.38-1.59)</b> | <b>1.30 (1.16-1.49)</b> | <b>1.34 (1.20-1.51)</b>  | <b>1.29 (1.13-1.47)</b>   |
| High-risk alcohol use      | --                      | --                      | <b>0.78 (0.68-0.89)</b>  | <b>0.76 (0.62-0.93)</b>   |
| Amphetamine use            | --                      | --                      | 0.82 (0.66-1.00)         | 0.77 (0.54-1.09)          |

Abbreviations: aHR, adjusted hazard ratio; CI, confidence interval; HCV, Hepatitis C virus; HBV, Hepatitis B virus; ART: antiretroviral therapy; VCY: viral copy-years; MSM: men who have sex with men; IDU: intravenous drug user

**Supplemental Table 8.** Multivariable Fine and Gray competing risks regression for incident CKD, excluding the race coefficient from the CKD-EPI equation

|                            | <b>Overall</b>            | <b>Genotyped</b>        | <b>PRO Cohort</b>       | <b>Both</b>             |
|----------------------------|---------------------------|-------------------------|-------------------------|-------------------------|
|                            | aHR (95% CI)              | aHR (95% CI)            | aHR (95% CI)            | aHR (95% CI)            |
| <b>Demographics</b>        |                           |                         |                         |                         |
| Female sex                 | <b>1.49 (1.38-1.62)</b>   | <b>1.64 (1.44-1.87)</b> | <b>1.45 (1.27-1.65)</b> | <b>1.55 (1.32-1.81)</b> |
| Age at study entry         | <b>1.07 (1.065-1.072)</b> | <b>1.07 (1.06-1.08)</b> | <b>1.08 (1.07-1.08)</b> | <b>1.07 (1.06-1.08)</b> |
| Black race                 | <b>1.42 (1.32-1.53)</b>   | 1.17 (0.85-1.60)        | <b>1.28 (1.16-1.42)</b> | 1.11 (0.75-1.66)        |
| Baseline creatinine        | <b>1.06 (1.04-1.08)</b>   | <b>1.35 (1.29-1.42)</b> | <b>1.36 (1.30-1.43)</b> | <b>1.35 (1.25-1.46)</b> |
| <i>APOLI</i> risk          | --                        | <b>1.29 (1.00-1.66)</b> | --                      | <b>1.33 (1.03-1.72)</b> |
| African ancestry           | --                        | 1.09 (0.75-1.57)        | --                      | 1.05 (0.66-1.67)        |
| <b>Comorbid Conditions</b> |                           |                         |                         |                         |
| HBV infection              | <b>1.32 (1.17-1.48)</b>   | --                      | --                      | --                      |
| Diabetes                   | <b>1.85 (1.70-2.00)</b>   | <b>1.35 (1.19-1.54)</b> | <b>1.23 (1.11-1.37)</b> | <b>1.19 (1.04-1.37)</b> |
| Hypertension               | <b>1.86 (1.71-2.03)</b>   | <b>1.66 (1.44-1.93)</b> | <b>1.58 (1.41-1.77)</b> | <b>1.60 (1.36-1.90)</b> |
| Log VCY                    | <b>1.03 (1.02-1.05)</b>   | <b>1.04 (1.01-1.07)</b> | --                      | --                      |
| ART duration               | --                        | --                      | <b>0.98 (0.96-0.99)</b> | 0.99 (0.97-1.01)        |
| PI duration                | --                        | --                      | --                      | --                      |
| INSTI duration             | <b>1.07 (1.05-1.11)</b>   | <b>1.11 (1.03-1.19)</b> | <b>1.09 (1.06-1.13)</b> | <b>1.13 (1.06-1.22)</b> |
| CD4 < 200 cells/mL         | <b>1.38 (1.28-1.48)</b>   | <b>1.25 (1.11-1.40)</b> | <b>1.32 (1.18-1.47)</b> | <b>1.28 (1.12-1.46)</b> |
| High-risk alcohol use      | --                        | --                      | <b>0.76 (0.66-0.87)</b> | <b>0.76 (0.72-0.93)</b> |
| Amphetamine use            | --                        | --                      | <b>0.86 (0.75-0.98)</b> | 0.92 (0.77-1.11)        |
| Cocaine/crack use          | --                        | --                      | 1.12 (0.99-1.26)        | 1.01 (0.88-1.16)        |

Abbreviations: aHR, adjusted hazard ratio; CI, confidence interval; HCV, Hepatitis C virus; HBV, Hepatitis B virus; ART: antiretroviral therapy; VCY: viral copy-years; MSM: men who have sex with men; IDU: intravenous drug user

**Supplemental Table 9.** Multivariable Fine and Gray competing risks regression for incident CKD

|                            | <b>PRO Cohort</b>         | <b>Both</b>             |
|----------------------------|---------------------------|-------------------------|
|                            | aHR (95% CI)              | aHR (95% CI)            |
| <b>Demographics</b>        |                           |                         |
| Female sex                 | <b>1.51 (1.24-1.84)</b>   | <b>1.49 (1.16-1.91)</b> |
| Age at study entry         | <b>1.07 (1.065-1.081)</b> | <b>1.07 (1.06-1.09)</b> |
| Black race                 | <b>0.72 (0.61-0.84)</b>   | 0.83 (0.43-1.58)        |
| Baseline creatinine        | <b>1.41 (1.35-1.47)</b>   | <b>1.48 (1.41-1.54)</b> |
| <i>APOLI</i> risk          | --                        | 1.42 (0.94-2.13)        |
| African ancestry           | --                        | 0.73 (0.33-1.59)        |
| <b>Comorbid Conditions</b> |                           |                         |
| HBV infection              | 0.88 (0.62-1.27)          | 1.02 (0.73-1.42)        |
| HCV infection              | 0.94 (0.79-1.13)          | 1.02 (0.82-1.26)        |
| Diabetes                   | <b>1.48 (1.25-1.75)</b>   | <b>1.50 (1.21-1.86)</b> |
| Hypertension               | <b>1.66 (1.38-2.01)</b>   | <b>1.65 (1.30-2.10)</b> |
| Log VCY                    | 1.00 (0.97-1.03)          | 1.04 (0.999-1.084)      |
| ARV Naïve                  | <b>0.78 (0.67-0.91)</b>   | <b>0.79 (0.65-0.97)</b> |
| ART duration               | <b>0.95 (0.92-0.99)</b>   | 0.97 (0.92-1.02)        |
| INSTI duration             | <b>1.16 (1.08-1.25)</b>   | <b>1.22 (1.09-1.36)</b> |
| AZT duration               | 1.01 (0.93-1.10)          | 0.92 (0.79-1.07)        |
| IND duration               | 1.04 (0.96-1.14)          | 0.99 (0.85-1.15)        |
| CD4 < 200 cells/mL         | <b>1.27 (1.08-1.48)</b>   | 1.20 (0.99-1.46)        |
| Entry year                 | <b>0.97 (0.95-0.98)</b>   | 0.98 (0.96-1.00)        |
| Substances used $\geq 4^*$ | 0.79 (0.60-1.03)          | 0.67 (0.43-1.02)        |

Abbreviations: aHR, adjusted hazard ratio; CI, confidence interval; HCV, Hepatitis C virus; HBV, Hepatitis B virus; ART: antiretroviral therapy; VCY: viral copy-years; MSM: men who have sex with men; IDU: intravenous drug user

\*includes: high risk alcohol use and current or past: methamphetamine use, cocaine use, marijuana use, illicit opioid use, or intravenous drug use

**Supplemental Table 10.** Multivariable Fine and Gray competing risks regression for incident CKD, including BMI

|                              | <b>Overall</b>            | <b>Genotyped</b>           | <b>PRO Cohort</b>         | <b>Both</b>             |
|------------------------------|---------------------------|----------------------------|---------------------------|-------------------------|
|                              | aHR (95% CI)              | aHR (95% CI)               | aHR (95% CI)              | aHR (95% CI)            |
| <b>Demographics</b>          |                           |                            |                           |                         |
| Female sex                   | <b>1.78 (1.53-2.07)</b>   | <b>1.78 (1.52-2.07)</b>    | <b>1.65 (1.37-1.98)</b>   | <b>1.62 (1.34-1.95)</b> |
| Age at study entry           | <b>1.07 (1.061-1.077)</b> | <b>1.069 (1.061-1.077)</b> | <b>1.07 (1.062-1.080)</b> | <b>1.07 (1.06-1.08)</b> |
| Black race                   | <b>0.64 (0.55-0.73)</b>   | 0.74 (0.51-1.06)           | <b>0.57 (0.49-0.67)</b>   | 0.64 (0.40-1.00)        |
| Baseline creatinine          | <b>1.39 (1.33-1.45)</b>   | <b>1.38 (1.33-1.44)</b>    | <b>1.41 (1.31-1.52)</b>   | <b>1.41 (1.31-1.51)</b> |
| 2 <i>APOLI</i> risk (ref: 0) | --                        | <b>1.55 (1.15-2.11)</b>    | --                        | <b>1.60 (1.15-2.21)</b> |
| African ancestry             | --                        | 0.75 (0.48-1.18)           | --                        | 0.83 (0.48-1.42)        |
| <b>Comorbid Conditions</b>   |                           |                            |                           |                         |
| HBV infection                | 1.15 (0.91-1.45)          | 1.12 (0.88-1.42)           | 1.09 (0.85-1.38)          | 1.09 (0.85-1.39)        |
| Diabetes                     | <b>1.43 (1.23-1.66)</b>   | <b>1.46 (1.26-1.70)</b>    | <b>1.34 (1.14-1.57)</b>   | <b>1.36 (1.16-1.60)</b> |
| Hypertension                 | <b>1.60 (1.36-1.89)</b>   | <b>1.62 (1.37-1.91)</b>    | <b>1.62 (1.36-1.93)</b>   | <b>1.61 (1.35-1.93)</b> |
| BMI                          | 1.00 (0.99-1.01)          | 1.00 (0.99-1.00)           |                           |                         |
| Log VCY                      | <b>1.05 (1.02-1.09)</b>   | <b>1.05 (1.02-1.09)</b>    | --                        | --                      |
| ARV Naïve                    | --                        | --                         | 0.92 (0.78-1.06)          | 0.90 (0.78-1.05)        |
| PI duration                  | --                        | --                         | --                        | --                      |
| INSTI duration               | <b>1.11 (1.03-1.20)</b>   | <b>1.11 (1.03-1.19)</b>    | <b>1.11 (1.03-1.20)</b>   | <b>1.11 (1.03-1.20)</b> |
| CD4 < 200 cells/mL           | 1.11 (0.96-1.29)          | 1.15 (0.99-1.32)           | <b>1.16 (1.00-1.34)</b>   | <b>1.18 (1.02-1.37)</b> |
| High-risk alcohol use        | --                        | --                         | <b>0.66 (0.52-0.83)</b>   | <b>0.63 (0.50-0.80)</b> |
| Amphetamine use              | --                        | --                         | 1.16 (0.98-1.38)          | 1.15 (0.97-1.37)        |

Abbreviations: aHR, adjusted hazard ratio; CI, confidence interval; HCV, Hepatitis C virus; HBV, Hepatitis B virus; ART: antiretroviral therapy; VCY: viral copy-years; MSM: men who have sex with men; IDU: intravenous drug user

**Supplemental Table 11.** Multivariable Fine and Gray competing risks regression for incident CKD, with econometric fixed effects for study site

|                              | <b>Overall</b>            | <b>Genotyped</b>           | <b>PRO Cohort</b>         | <b>Both</b>               |
|------------------------------|---------------------------|----------------------------|---------------------------|---------------------------|
|                              | aHR (95% CI)              | aHR (95% CI)               | aHR (95% CI)              | aHR (95% CI)              |
| <b>Demographics</b>          |                           |                            |                           |                           |
| Female sex                   | <b>1.63 (1.49-1.79)</b>   | <b>1.77 (1.53-2.06)</b>    | <b>1.61 (1.39-1.88)</b>   | <b>1.63 (1.36-1.95)</b>   |
| Age at study entry           | <b>1.07 (1.065-1.074)</b> | <b>1.068 (1.060-1.077)</b> | <b>1.07 (1.067-1.078)</b> | <b>1.069 (1.060-1.78)</b> |
| Black race                   | <b>0.78 (0.71-0.86)</b>   | 0.68 (0.47-1.00)           | <b>0.62 (0.54-0.71)</b>   | <b>0.56 (0.35-0.90)</b>   |
| Baseline creatinine          | <b>1.07 (1.05-1.08)</b>   | <b>1.40 (1.35-1.46)</b>    | <b>1.41 (1.35-1.47)</b>   | <b>1.43 (1.34-1.52)</b>   |
| 2 <i>APOLI</i> risk (ref: 0) | --                        | <b>1.54 (1.14-2.07)</b>    | --                        | <b>1.60 (1.17-2.20)</b>   |
| African ancestry             | --                        | 0.77 (0.49-1.22)           | --                        | 0.90 (0.52-1.56)          |
| <b>Comorbid Conditions</b>   |                           |                            |                           |                           |
| HBV infection                | <b>1.44 (1.26-1.65)</b>   | 1.03 (0.80-1.32)           | 1.00 (0.76-1.33)          | 0.95 (0.74-1.23)          |
| Diabetes                     | <b>1.86 (1.70-2.04)</b>   | <b>1.40 (1.34-1.46)</b>    | <b>1.33 (1.18-1.49)</b>   | <b>1.29 (1.10-1.51)</b>   |
| Hypertension                 | <b>1.85 (1.68-2.04)</b>   | <b>1.59 (1.35-1.88)</b>    | <b>1.55 (1.36-1.76)</b>   | <b>1.60 (1.34-1.92)</b>   |
| Log VCY                      | <b>1.04 (1.03-1.06)</b>   | <b>1.03 (1.00-1.07)</b>    | --                        | <b>1.04 (1.01-1.08)</b>   |
| ARV Naïve                    | --                        | --                         | 0.93 (0.83-1.03)          | 0.90 (0.78-1.03)          |
| PI duration                  | --                        | --                         | --                        | --                        |
| INSTI duration               | <b>1.09 (1.06-1.13)</b>   | <b>1.11 (1.03-1.20)</b>    | <b>1.09 (1.05-1.13)</b>   | <b>1.13 (1.05-1.21)</b>   |
| CD4 < 200 cells/mL           | <b>1.35 (1.24-1.46)</b>   | <b>1.16 (1.01-1.33)</b>    | <b>1.25 (1.12-1.40)</b>   | <b>1.17 (1.01-1.36)</b>   |
| High-risk alcohol use        | --                        | --                         | <b>0.69 (0.58-0.81)</b>   | <b>0.61 (0.47-0.77)</b>   |
| Amphetamine use              | --                        | --                         | 0.98 (0.86-1.11)          | 1.01 (0.84-1.22)          |

Abbreviations: aHR, adjusted hazard ratio; CI, confidence interval; HCV, Hepatitis C virus; HBV, Hepatitis B virus; ART: antiretroviral therapy; VCY: viral copy-years; MSM: men who have sex with men; IDU: intravenous drug user

**Supplemental Table 12.** Multivariable Fine and Gray competing risks regression for incident CKD adjusting for baseline eGFR

|                              | <b>Overall</b>             | <b>Genotyped</b>           | <b>PRO Cohort</b>          | <b>Both</b>                |
|------------------------------|----------------------------|----------------------------|----------------------------|----------------------------|
|                              | aHR (95% CI)               | aHR (95% CI)               | aHR (95% CI)               | aHR (95% CI)               |
| <b>Demographics</b>          |                            |                            |                            |                            |
| Female sex                   | <b>1.38 (1.25-1.52)</b>    | <b>1.33 (1.14-1.56)</b>    | <b>1.33 (1.17-1.51)</b>    | <b>1.21 (1.00-1.46)</b>    |
| Age at study entry           | <b>1.048 (1.043-1.053)</b> | <b>1.048 (1.041-1.056)</b> | <b>1.051 (1.045-1.057)</b> | <b>1.04 (1.038-1.055)</b>  |
| Black race                   | <b>0.77 (0.70-0.85)</b>    | 0.93 (0.65-1.32)           | <b>0.75 (0.66-0.84)</b>    | 0.74 (0.47-1.17)           |
| Baseline eGFR                | <b>0.951 (0.949-0.953)</b> | <b>0.951 (0.949-0.954)</b> | <b>0.948 (0.946-0.950)</b> | <b>0.949 (0.945-0.952)</b> |
| 2 <i>APOLI</i> risk (ref: 0) | --                         | <b>1.56 (1.22-1.99)</b>    | --                         | <b>1.41 (1.06-1.89)</b>    |
| African ancestry             | --                         | 0.68 (0.44-1.06)           | --                         | 0.84 (0.49-1.43)           |
| <b>Comorbid Conditions</b>   |                            |                            |                            |                            |
| HCV infection                | <b>0.82 (0.74-0.90)</b>    | <b>0.84 (0.72-0.98)</b>    | <b>0.80 (0.71-0.91)</b>    | <b>0.84 (0.71-0.998)</b>   |
| HBV infection                | 1.02 (0.87-1.21)           | 0.85 (0.66-1.09)           | 0.99 (0.81-1.22)           | --                         |
| Diabetes                     | 1.14 (1.03-1.27)           | 1.11 (0.95-1.30)           | 0.94 (0.83-1.07)           | --                         |
| Hypertension                 | <b>1.60 (1.44-1.77)</b>    | <b>1.45 (1.23-1.72)</b>    | <b>1.50 (1.31-1.71)</b>    | <b>1.52 (1.27-1.81)</b>    |
| Log VCY                      | 1.01 (0.996-1.032)         | <b>1.04 (1.01-1.07)</b>    | <b>1.01 (0.99-1.04)</b>    | <b>1.06 (1.03-1.11)</b>    |
| ARV Naïve                    | <b>0.89 (0.81-0.97)</b>    | --                         | <b>0.85 (0.75-0.95)</b>    | 0.82 (0.70-0.96)           |
| PI duration                  | --                         | --                         | --                         | --                         |
| INSTI duration               | <b>1.11 (1.08-1.14)</b>    | <b>1.14 (1.06-1.22)</b>    | <b>1.10 (1.07-1.13)</b>    | <b>1.15 (1.07-1.23)</b>    |
| CD4 < 200 cells/mL           | 1.08 (0.99-1.18)           | 1.01 (0.87-1.16)           | 1.12 (0.995-1.25)          | 1.03 (0.89-1.21)           |
| High-risk alcohol use        | --                         | --                         | 0.87 (0.74-1.02)           | <b>0.70 (0.54-0.91)</b>    |
| Amphetamine use              | --                         | --                         | 1.11 (0.97-1.27)           | 1.12 (0.93-1.35)           |

Abbreviations: aHR, adjusted hazard ratio; CI, confidence interval; HCV, Hepatitis C virus; HBV, Hepatitis B virus; ART: antiretroviral therapy; VCY: viral copy-years; MSM: men who have sex with men; IDU: intravenous drug user; eGFR: estimated glomerular filtration rate

Supplemental Figure 1. Genetic Ancestry Distribution among PWH

- EUR: European
- AFR: African
- AMR: Ad Mixed American
- SAS: South Asian
- EAS: East Asian

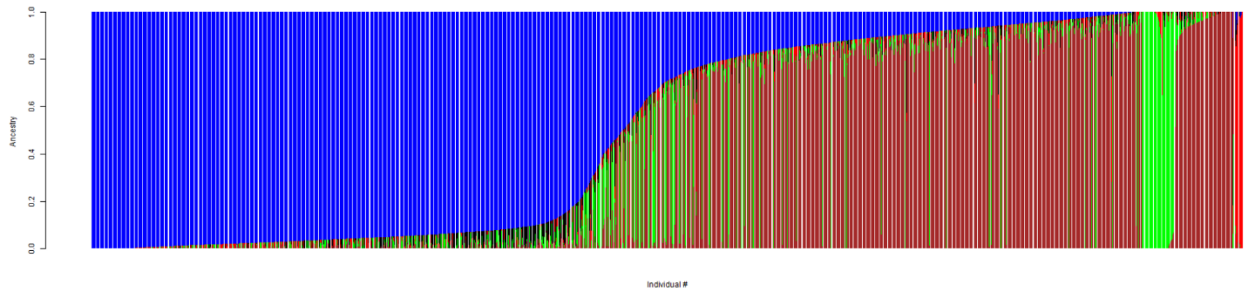

Supplemental Figure 3. Martingale residuals to assess linearity for antiretroviral therapy duration (years)

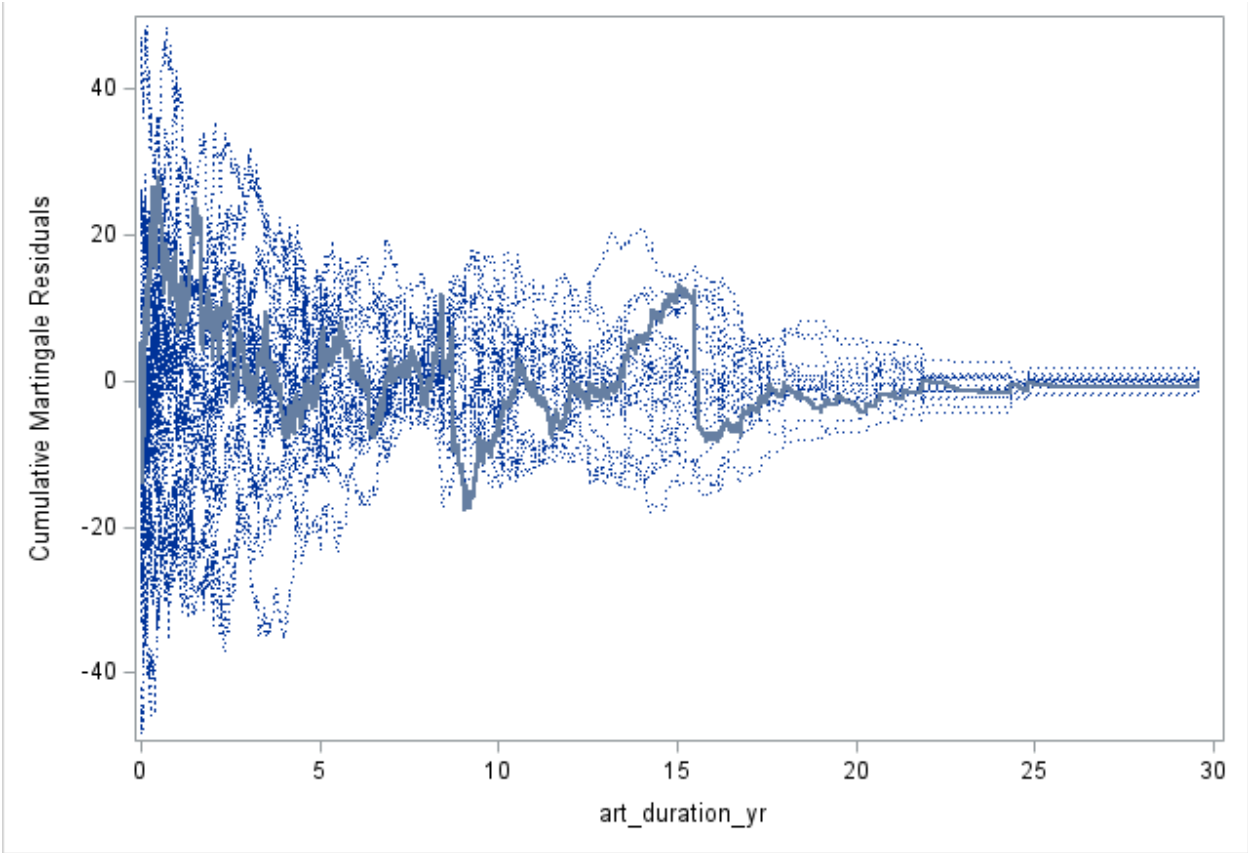

Supplemental Figure 4. Martingale residuals to assess linearity for viral copy-years

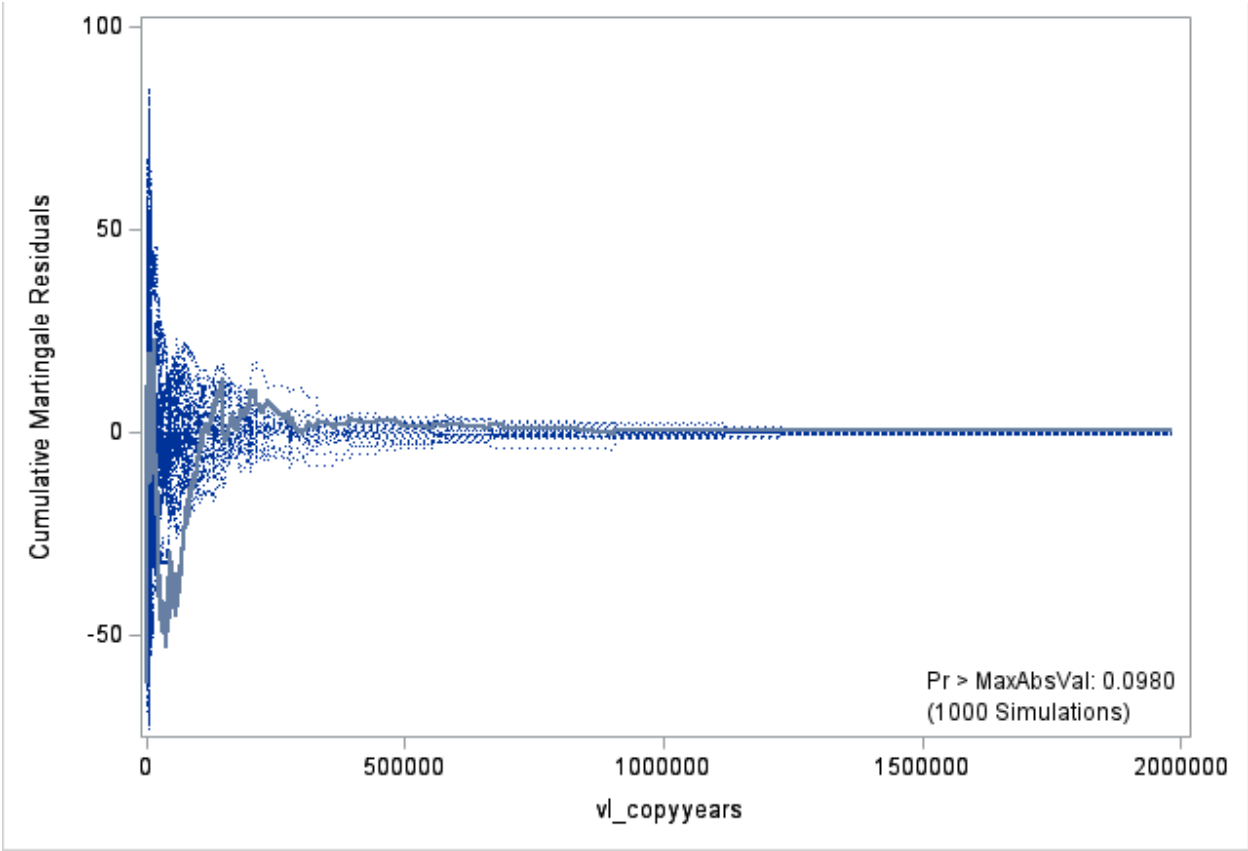



Supplemental Figure 5. Martingale residuals to assess linearity for creatinine

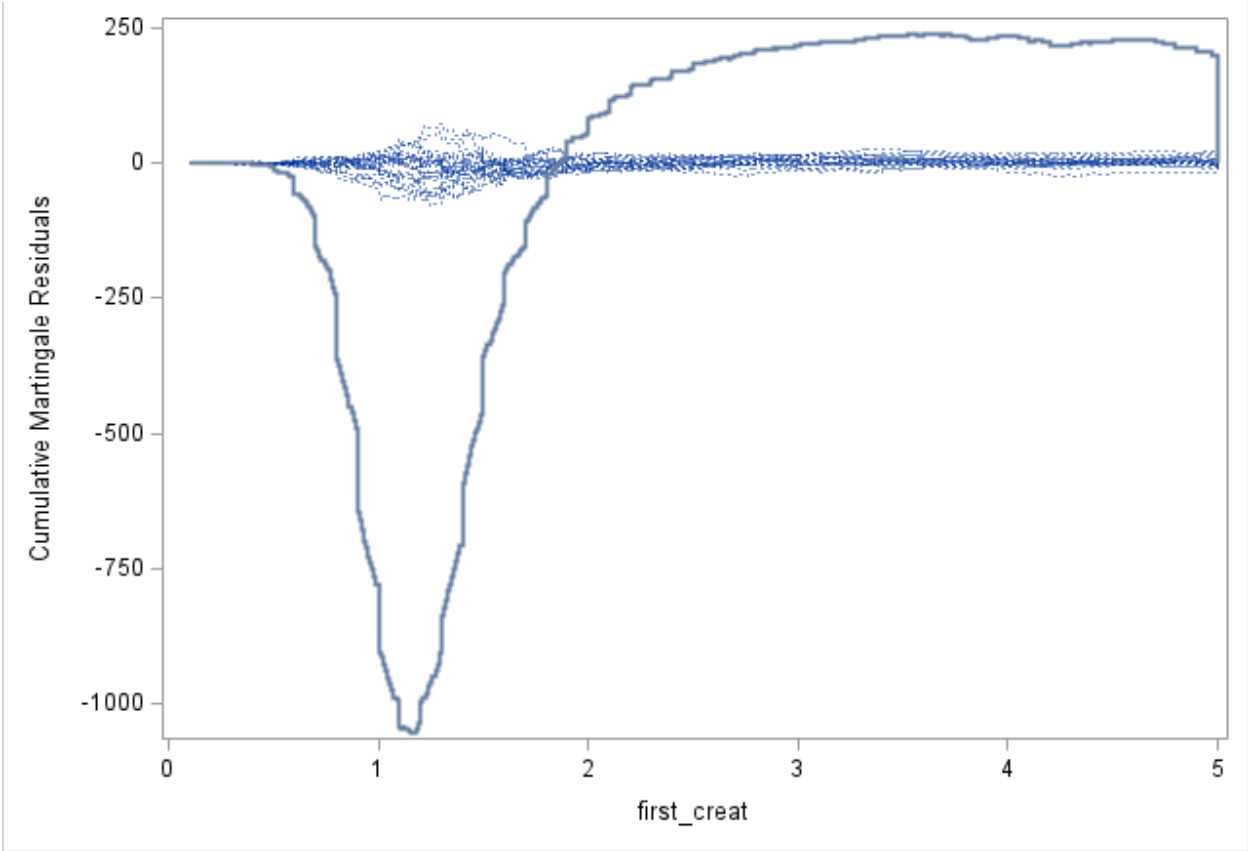

Supplement: mmc1.pdf [file mmc1.pdf]
